# Supplementary material for: Ab initiosurface properties of Ag–Sn alloys: implications for lead-free soldering
Source: Royal Society of Chemistry journal article supplement (doi:10.1039/c7cp07551k), 2018-01-01
Supplement: c7cp07551k1.pdf [file c7cp07551k1.pdf]

## Ab Initio Surface Properties of Ag-Sn alloys: Implications for Lead-Free Soldering

Gabriele Saleh<sup>a,\*</sup>, Xu Chen<sup>b</sup>, Stefano Sanvito<sup>a</sup>

<sup>a</sup> School of Physics, AMBER and CRANN institute, Trinity College Dublin, College Green, Dublin 2, Ireland

<sup>b</sup> Nokia Bell Labs, 600 Mountain Avenue, Murray Hill, NJ ,United States of America

CORRESPONDING AUTHOR:

\*email: gabrielesaleh@outlook.com

Electronic Supplementary Information (ESI)

Table S1 Surface energies for Ag<sub>3</sub>Sn. The values obtained with the FM method (see Section 2 of the main text) are reported in parenthesis.

| hkl | Excess Sn <sup>a</sup> | Es min <sup>b</sup> [eV/Å <sup>2</sup> ] | Es max <sup>b</sup> [eV/Å <sup>2</sup> ] | average <sup>b</sup> [eV/Å <sup>2</sup> ] |
|-----|------------------------|------------------------------------------|------------------------------------------|-------------------------------------------|
| 001 | 0                      | 0.0344(0.0330)                           | 0.0344(0.0330)                           | 0.0344(0.0330)                            |
|     | 0                      | 0.0360                                   | 0.0360                                   | 0.0360                                    |
| 010 | +1                     | 0.0396                                   | 0.0377                                   | 0.0386                                    |
|     | -1                     | 0.0459                                   | 0.0478                                   | 0.0469                                    |
| 011 | +2                     | 0.0349(0.0352)                           | 0.0325(0.0327)                           | 0.0336(0.0337)                            |
|     | 0                      | 0.0429                                   | 0.0429                                   | 0.0429                                    |
|     | -3                     | 0.0641                                   | 0.0679                                   | 0.0660                                    |
|     | -2                     | 0.0498                                   | 0.0522                                   | 0.0510                                    |
|     | +3                     | 0.0390(0.0373)                           | 0.0353(0.0336)                           | 0.0371(0.0354)                            |
| 021 | 0                      | 0.0361(0.0366)                           | 0.0361(0.0366)                           | 0.0361(0.0366)                            |
| 023 | 0                      | 0.0425 (0.0416)                          | 0.0425 (0.0416)                          | 0.0425 (0.0416)                           |
| 100 | 0                      | 0.0365 (0.0369)                          | 0.0365(0.0369)                           | 0.0365(0.0369)                            |
| 110 | 1                      | 0.0423                                   | 0.0411                                   | 0.0417                                    |
|     | -1                     | 0.0516                                   | 0.0528                                   | 0.0522                                    |
|     | -3                     | 0.0633                                   | 0.0669                                   | 0.0651                                    |
|     | 3                      | 0.0381(0.0362)                           | 0.0346(0.0327)                           | 0.0363(0.0345)                            |
| 111 | 1                      | 0.0426                                   | 0.0416                                   | 0.0421                                    |
|     | -1                     | 0.0486                                   | 0.0495                                   | 0.0490                                    |
|     | 0                      | 0.0446                                   | 0.0446                                   | 0.0446                                    |
|     | -2                     | 0.0527                                   | 0.0546                                   | 0.0537                                    |
|     | 2                      | 0.0410                                   | 0.0391                                   | 0.0400                                    |
|     | 1                      | 0.0431                                   | 0.0422                                   | 0.0427                                    |
| 121 | 0                      | 0.0404                                   | 0.0404                                   | 0.0404                                    |
| 223 | 0                      | 0.0445                                   | 0.0445                                   | 0.0445                                    |
| 221 | 0                      | 0.0453                                   | 0.0453                                   | 0.0453                                    |
|     | 0                      | 0.0436                                   | 0.0436                                   | 0.0436                                    |
| 101 | 2                      | 0.0367                                   | 0.0345                                   | 0.0356                                    |
|     | 2                      | 0.0373                                   | 0.0351                                   | 0.0362                                    |
|     | 0                      | 0.0446                                   | 0.0446                                   | 0.0446                                    |
|     | -2                     | 0.0533                                   | 0.0555                                   | 0.0544                                    |
|     | 0                      | 0.0435                                   | 0.0435                                   | 0.0435                                    |
| 102 | 1                      | 0.0407                                   | 0.0400                                   | 0.0403                                    |
| 120 | 0                      | 0.0451                                   | 0.0451                                   | 0.0451                                    |

<sup>a</sup> number of Sn atoms on each surface in excess with respect to the compound stoichiometry

<sup>b</sup> max, min and average refer to the Sn chemical potential, see eq. 2 of the main text

Table S2 Surface energies for AgSn<sub>2</sub>. The values obtained with the FM method (see Section 2 of the maintext) are reported in parenthesis.

| hkl | Excess Sn <sup>a</sup> | Es min <sup>b</sup> [eV/Å <sup>2</sup> ] | Es max <sup>b</sup> [eV/Å <sup>2</sup> ] | average <sup>b</sup> [eV/Å <sup>2</sup> ] |
|-----|------------------------|------------------------------------------|------------------------------------------|-------------------------------------------|
| 001 | -2                     | 0.0402                                   | 0.0414                                   | 0.0408                                    |
|     | 2                      | 0.0259<br>(0.0226)                       | 0.0247<br>(0.0214)                       | 0.0253<br>(0.0220)                        |
| 100 | -2                     | 0.0385                                   | 0.0399                                   | 0.0392                                    |
|     | 0                      | 0.0295                                   | 0.0295                                   | 0.0295                                    |
|     | 2                      | 0.0239<br>(0.0245)                       | 0.0224<br>(0.0230)                       | 0.0232<br>(0.0237)                        |
| 101 | -1                     | 0.0355                                   | 0.0364                                   | 0.0360                                    |
|     | 1                      | 0.0260<br>(0.0252)                       | 0.0251<br>(0.0242)                       | 0.0255<br>(0.0247)                        |
|     | 0                      | 0.0293                                   | 0.0293                                   | 0.0293                                    |
| 110 | -1                     | 0.0307                                   | 0.0317                                   | 0.0312                                    |
|     | -2                     | 0.0460                                   | 0.0481                                   | 0.0470                                    |
|     | 1                      | 0.0247<br>(0.0208)                       | 0.0236<br>(0.0197)                       | 0.0242<br>(0.0202)                        |
|     | 2                      | 0.0308<br>(0.0268)                       | 0.0287<br>(0.0247)                       | 0.0297<br>(0.0258)                        |
| 111 | -1                     | 0.0291                                   | 0.0299                                   | 0.0295                                    |
|     | 1                      | 0.0278                                   | 0.0270                                   | 0.0274                                    |
|     | 2                      | 0.0272<br>(0.0241)                       | 0.0256<br>(0.0233)                       | 0.0264<br>(0.0237)                        |
|     | -2                     | 0.0325                                   | 0.0341                                   | 0.0333                                    |
| 121 |                        | 0.0266<br>(0.0251)                       | 0.0266<br>(0.0251)                       | 0.0266<br>(0.0251)                        |
|     | 1                      | 0.0312                                   | 0.0300                                   | 0.0306                                    |

<sup>a</sup> number of Sn atoms on each surface in excess with respect to the compound stoichiometry

<sup>b</sup> max, min and average refer to the Sn chemical potential, see eq. 2 of the main text

Table S3 Surface energies for the most stable surfaces of β-Sn (most stable terminations). The values obtained with the FM method (see Section 2 of the main text) are reported in parenthesis.

| hkl | Es [eV/Å <sup>2</sup> ] |
|-----|-------------------------|
| 100 | 0.0225(0.0250)          |
| 101 | 0.0229(0.0224)          |
| 201 | 0.0243                  |
| 112 | 0.0222(0.0261)          |
| 122 | 0.0230                  |

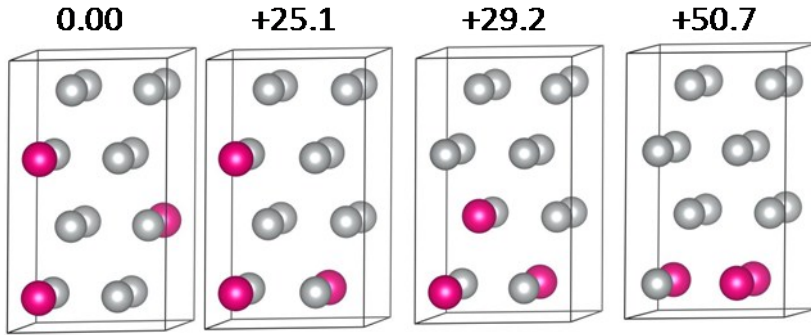

Figure S1 Various configurations of  $\text{Ag}_{13}\text{Sn}_3$  ( $2 \times 2 \times 2$  hcp-Ag supercell). The leftmost one is the most stable; for the other structures the energy (meV/atom) with respect to the most stable configuration is reported

Table S4 energy of  $\text{Ag}_{35}\text{Sn}_9$  slabs, with various positions of Sn atoms

| structure <sup>a</sup>                        | Energy <sup>b</sup> (meV/<br>slab-atom) |
|-----------------------------------------------|-----------------------------------------|
| 1-0-1-1-1-1-1-1-1-0-1<br>(Fig. 2e, main text) | 0.00                                    |
| 2-0-1-1-0-1-0-1-1-0-2<br>(Fig. 2f, main text) | 0.44                                    |
| 1-1-1-1-1-0-1-1-1-1-1                         | 1.60                                    |
| 2-1-0-1-0-1-0-1-0-1-2                         | 2.69                                    |
| 1-1-0-1-1-1-1-1-0-1-1                         | 2.75                                    |
| 2-1-1-0-0-1-0-0-1-1-2                         | 4.10                                    |
| 0-1-1-1-1-1-1-1-1-1-0                         | 27.94                                   |
| 4-0-0-0-0-1-0-0-0-0-4                         | 71.94                                   |
| 0-4-0-0-0-1-0-0-0-0-4-0                       | 112.20                                  |

<sup>a</sup> the nomenclature consists of a number for each of the 11 layers composing the slab. That number represents the number of Sn atoms in the corresponding slabs (*cf* first two entries with Fig. 2e-f of the main text)

<sup>b</sup> energy given with respect to the most stable structure

Table S5 Comparison between calculated (PBE/plane waves) and predicted (“surface mixing rule”, see Section 3.3 and ref. 31 of the main text) oxygen adsorption energies. The 5<sup>th</sup> column ( $E_{O}^{ads-mix}$ ) reports the adsorption energy predicted by the surface mixing rule, and the 6<sup>th</sup> column reports the difference with respect to the DFT energy ( $\epsilon$ ). The same goes for 7<sup>th</sup> and 8<sup>th</sup> columns ( $E_{O}^{ads-mix'}$  and  $\epsilon'$ ), with the difference that the surface mixing rule value is calculated by substituting the adsorption energy of pure Ag with that of the Ag3 site in the considered alloy. We mention that a linear fitting of  $E_{O}^{ads-DFT}$  vs  $E_{O}^{ads-mix'}$  (excluding  $Ag_4Sn^{(50)}$ , for the reasons discussed in the main text) results in a linear coefficient much closer to the ideal value of 1.0 and higher  $R^2$  with respect to  $E_{O}^{ads-DFT}$  vs  $E_{O}^{ads-mix}$  (linear coefficient: 0.998 vs 1.133 ;  $R^2$ : 0.824 vs 0.744).

| system                             | surface | site <sup>a</sup> | $E_{O}^{ads-DFT}$<br>(eV) | $E_{O}^{ads-mix}$ (eV) | $\epsilon$ | $E_{O}^{ads-mix'}$ (eV) | $\epsilon'$ |
|------------------------------------|---------|-------------------|---------------------------|------------------------|------------|-------------------------|-------------|
| Ag <sub>3</sub> Sn                 | 001     | Ag2Sn             | 1.80                      | 2.05                   | 0.25       | 1.75                    | -0.05       |
| Ag <sub>3</sub> Sn                 | 011     | AgSn2             | 2.81                      | 3.05                   | 0.24       | 2.90                    | 0.09        |
| Ag <sub>3</sub> Sn                 | 011     | Ag2Sn             | 2.14                      | 2.05                   | -0.08      | 1.75                    | -0.38       |
| Ag <sub>4</sub> Sn <sup>(25)</sup> | 001     | Ag2Sn             | 1.61                      | 2.05                   | 0.44       | 1.47                    | -0.14       |
| Ag <sub>4</sub> Sn <sup>(50)</sup> | 001     | Ag2Sn             | 2.14                      | 2.05                   | -0.09      | 1.47                    | -0.67       |
| Ag <sub>4</sub> Sn <sup>(50)</sup> | 001     | AgSn2             | 2.45                      | 3.05                   | 0.43       | 2.76                    | 0.14        |

a)the 3 atoms forming the hollow sites are indicated

Table S6 Oxygen adsorption energies  $E_{O}^{ads}$  on supercells (lower coverage) for selected surfaces of Ag-Sn alloys

| system                             | surface | site <sup>a</sup>  | $E_{O}^{ads}$ (eV), single cell <sup>c</sup> | $E_{O}^{ads}$ (eV), supercell |
|------------------------------------|---------|--------------------|----------------------------------------------|-------------------------------|
| Sn                                 | 100     | Sn3 <sup>b</sup>   | 4.05 <sup>c</sup>                            | 4.25 <sup>d</sup>             |
| Ag <sub>3</sub> Sn                 | 001     | Ag2Sn <sup>b</sup> | 1.80                                         | 1.94 <sup>e</sup>             |
| Ag <sub>3</sub> Sn                 | 001     | Ag3                | 0.60                                         | 0.66 <sup>e</sup>             |
| Ag <sub>3</sub> Sn                 | 011     | AgSn2 <sup>b</sup> | 2.81                                         | 2.82 <sup>f</sup>             |
| Ag <sub>4</sub> Sn <sup>(25)</sup> | 001     | Ag2Sn <sup>b</sup> | 1.61 <sup>c</sup>                            | 1.70 <sup>e</sup>             |

<sup>a</sup> the 3 atoms forming the hollow sites are indicated

<sup>b</sup> most stable adsorption site for the corresponding surface

<sup>c</sup> Ag<sub>4</sub>Sn (that is based on hcp-Ag lattice) and Sn have small cells, that would result in a very high oxygen coverage. Therefore, we evaluated  $E_{O}^{ads}$  starting from 2x2 and 1x2 supercells, respectively.

<sup>d</sup> 2x2 supercell

<sup>e</sup> supercell obtained by applying a  $\begin{bmatrix} 1 & 1 \\ 1 & -1 \end{bmatrix}$  rotation matrix to the two-dimensional surface unit cell.

<sup>f</sup> 2x1 supercell

Table S7 Sulphur adsorption energies  $E_S^{\text{ads}}$  on supercells (lower coverage) for selected surfaces of Ag-Sn alloys

| system                             | surface | site <sup>a</sup>  | $E_S^{\text{ads}}$ (eV), single cell <sup>c</sup> | $E_S^{\text{ads}}$ (eV), supercell |
|------------------------------------|---------|--------------------|---------------------------------------------------|------------------------------------|
| Sn                                 | 100     | Sn3 <sup>b</sup>   | 1.30 <sup>c</sup>                                 | 2.02 <sup>d</sup>                  |
| Ag <sub>3</sub> Sn                 | 001     | Ag2Sn <sup>b</sup> | 0.52                                              | 0.69 <sup>e</sup>                  |
| Ag <sub>3</sub> Sn                 | 001     | 0.56               | 0.67 <sup>e</sup>                                 |                                    |
| Ag <sub>3</sub> Sn                 | 011     | AgSn2 <sup>b</sup> | 1.45                                              | 1.51 <sup>f</sup>                  |
| Ag <sub>4</sub> Sn <sup>(25)</sup> | 001     | Ag2Sn <sup>b</sup> | 0.48 <sup>c</sup>                                 | 1.70 <sup>e</sup>                  |

<sup>a</sup> the 3 atoms forming the hollow sites are indicated

<sup>b</sup> most stable adsorption site for the corresponding surface

<sup>c</sup> Ag<sub>4</sub>Sn (that is based on hcp-Ag lattice) and Sn have small cells, that would result in a very high sulphur coverage. Therefore, we evaluated  $E_S^{\text{ads}}$  starting from 2x2 and 1x2 supercells, respectively.

<sup>d</sup> 2x2 supercell

<sup>e</sup> supercell obtained by applying a  $\begin{bmatrix} 1 & 1 \\ 1 & -1 \end{bmatrix}$  rotation matrix to the two-dimensional surface unit cell.

<sup>f</sup> 2x1 supercell

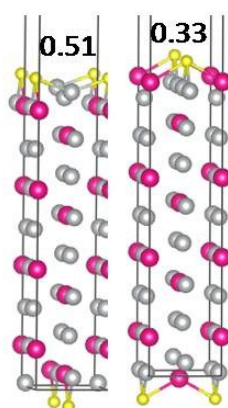

Figure S2 Additional sulphur adsorption positions on Ag<sub>3</sub>Sn(001) surface. Adsorption energies (see eq. 3b of the main text) are reported on top of each structure

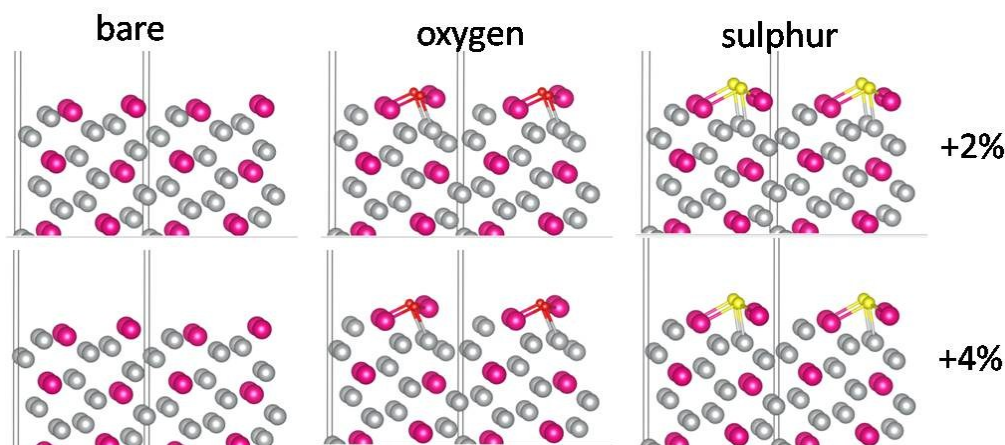

Figure S3 Ag<sub>3</sub>Sn(011) surfaces upon lattice expansion (indicated on the right): bare (left), with oxygen adsorbed onto them (middle), and with adsorbed sulphur (right). The adsorption sites are AgSn2 for oxygen, and AgSn3 for sulphur (see also Fig. 7c of the main text).
